# Supplementary material for: The role of soil components in the sorption of tetracycline and heavy metals in soils
Source: Royal Society of Chemistry journal article supplement (doi:10.1039/c8ra06631k), 2018-01-01
Supplement: c8ra06631k1.pdf [file c8ra06631k1.pdf]

## Supplementray Information

### The role of soil components on the sorption of tetracycline and heavy metal on soils

Zhendong Zhao<sup>a</sup>, Tiantian Nie<sup>a</sup>, Zhenyu Yang<sup>a</sup>, Wenjun Zhou<sup>a,b,\*</sup>

<sup>a</sup>Department of Environmental Science, Zhejiang University, Hangzhou, Zhejiang 310058, China

<sup>b</sup>Zhejiang Provincial Key Laboratory of Organic Pollution Process and Control, Hangzhou, Zhejiang 310058, China

**\*Corresponding author:** Tel: +86-571-88982591; Fax: +86-571-88982591; E-mail address:

wenjunzhou@zju.edu.cn

- Number of tables: 3
- Number of figures: 2

**Table S1** Molecular structure and physic-chemical properties of tetracycline (TC).

|                                   |                      |
|-----------------------------------|----------------------|
| Molecular structure               |                      |
| Molecular formula                 | $C_{22}H_{24}N_2O_8$ |
| Molar weight ( $g\ mol^{-1}$ )    | 444.43               |
| Water solubility ( $mg\ L^{-1}$ ) | 1700                 |
| $pK_a^a$                          | 3.3, 7.7, 9.7        |
| $\log K_{ow}^b$                   | -1.19                |
| Melting point ( $^{\circ}C$ )     | 214                  |

<sup>a</sup> $pK_a$ , dissociation constant; <sup>b</sup> $\log K_{ow}$ , octanol-water partition coefficient.

**Table S2** Freundlich parameters of TC sorption isotherms on BS, ROM, ROX and HA in the absence and presence of 4 mg L<sup>-1</sup> Cu<sup>2+</sup> or Cd<sup>2+</sup> and single-point sorption coefficients at three initial concentrations of  $C_{e1} = 5$  mg L<sup>-1</sup>,  $C_{e2} = 15$  mg L<sup>-1</sup>,  $C_{e3} = 25$  mg L<sup>-1</sup>.

| Sorbents | Cu or Cd<br>(mg L <sup>-1</sup> ) | $K_f$ (mg <sup>(1-n)</sup> L <sup>n</sup> g <sup>-1</sup> ) | n    | $R^2$ | $K_d$ (L g <sup>-1</sup> ) at $C_e$ (mg L <sup>-1</sup> ) |          |          |
|----------|-----------------------------------|-------------------------------------------------------------|------|-------|-----------------------------------------------------------|----------|----------|
|          |                                   |                                                             |      |       | $C_{e1}$                                                  | $C_{e2}$ | $C_{e3}$ |
| BS       | 0                                 | 6.53                                                        | 0.43 | 0.999 | 5.82                                                      | 2.1      | 1.44     |
|          | Cu= 4                             | 17.08                                                       | 0.36 | 0.991 | 52.8                                                      | 10.75    | 5.14     |
|          | Cd=4                              | 6.4                                                         | 0.44 | 0.995 | 5.56                                                      | 1.94     | 1.45     |
| ROM      | 0                                 | 19.69                                                       | 0.34 | 0.993 | 26.15                                                     | 6.2      | 3.45     |
|          | Cu = 4                            | 40.19                                                       | 0.29 | 0.992 | —                                                         | 35.62    | 10.7     |
|          | Cd = 4                            | 17.94                                                       | 0.35 | 0.995 | 21.98                                                     | 5.74     | 3.24     |
| ROX      | 0                                 | 32.56                                                       | 0.36 | 0.991 | 93.69                                                     | 18.27    | 8.44     |
|          | Cu = 4                            | 60.55                                                       | 0.24 | 0.995 | —                                                         | 127.93   | 26.29    |
|          | Cd= 4                             | 29.85                                                       | 0.33 | 0.994 | 66.14                                                     | 13.25    | 6.5      |
| HA       | 0                                 | 74.12                                                       | 0.36 | 0.983 | —                                                         | 115.34   | 51       |
|          | Cu = 4                            | 61.82                                                       | 0.44 | 0.998 | 257.89                                                    | 116.24   | 42.91    |
|          | Cd = 4                            | 59.68                                                       | 0.51 | 0.992 | 148.02                                                    | 93.98    | 42.26    |

**Table S3** Freundlich parameters of Cu<sup>2+</sup> and Cd<sup>2+</sup> sorption isotherms on BS, ROM, ROX and HA and single-point sorption coefficients at three initial concentrations of C<sub>e1</sub> = 2 mg L<sup>-1</sup>, C<sub>e2</sub> = 8 mg L<sup>-1</sup>, C<sub>e3</sub> = 20 mg L<sup>-1</sup>.

|                  | Sorbents | K <sub>f</sub> (mg <sup>(1-n)</sup> L <sup>n</sup> g <sup>-1</sup> ) | n    | R <sup>2</sup> | K <sub>d</sub> (L g <sup>-1</sup> ) at C <sub>e</sub> (mg L <sup>-1</sup> ) |                 |                 |
|------------------|----------|----------------------------------------------------------------------|------|----------------|-----------------------------------------------------------------------------|-----------------|-----------------|
|                  |          |                                                                      |      |                | C <sub>e1</sub>                                                             | C <sub>e2</sub> | C <sub>e3</sub> |
| Cu <sup>2+</sup> | BS       | 2.85                                                                 | 0.40 | 0.993          | 2.22                                                                        | 0.94            | 0.50            |
|                  | ROM      | 2.13                                                                 | 0.45 | 0.995          | 1.99                                                                        | 0.83            | 0.45            |
|                  | ROX      | 4.28                                                                 | 0.57 | 0.993          | 4.33                                                                        | 2.61            | 1.45            |
|                  | HA       | 8.56                                                                 | 0.38 | 0.992          | 22.05                                                                       | 5.87            | 2.01            |
| Cd <sup>2+</sup> | BS       | 2.89                                                                 | 0.34 | 0.993          | 2.77                                                                        | 0.85            | 0.42            |
|                  | ROM      | 1.74                                                                 | 0.43 | 0.995          | 1.76                                                                        | 0.64            | 0.35            |
|                  | ROX      | 2.55                                                                 | 0.67 | 0.996          | 2.53                                                                        | 1.45            | 1.06            |
|                  | HA       | 6.16                                                                 | 0.44 | 0.990          | 12.44                                                                       | 3.51            | 1.56            |

### **Figure captions**

**Fig S1** The interrelations of organic matter, metal oxide and clay among black soil (BS), removed organic matter (ROM), removed metal oxide (ROX) and humic acid (HA).

**Fig S2** Zeta potential of the black soil (BS), removed organic matter (ROM), removed metal oxide (ROX) and humic acid (HA) suspension at different pH.

**Fig S1** The interrelations of organic matter, metal oxide and clay among black soil (BS), removed organic matter (ROM), removed metal oxide (ROX) and humic acid (HA).

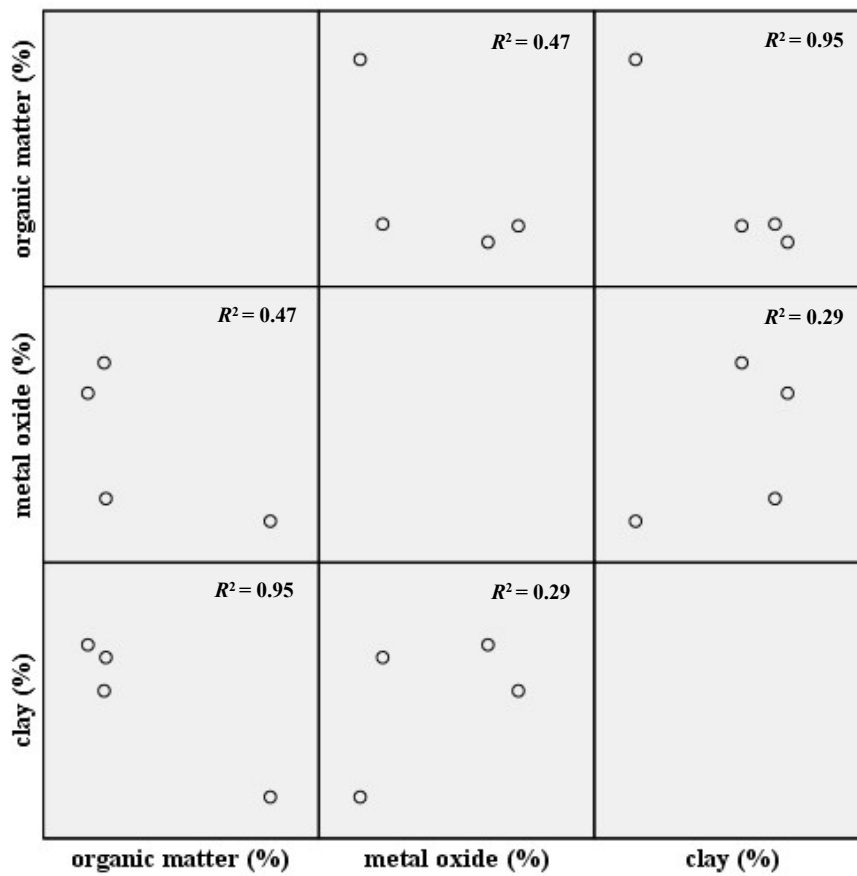

**Fig S2** Zeta potential of the black soil (BS), removed organic matter (ROM), removed metal oxide (ROX) and humic acid (HA) suspension at different pH.

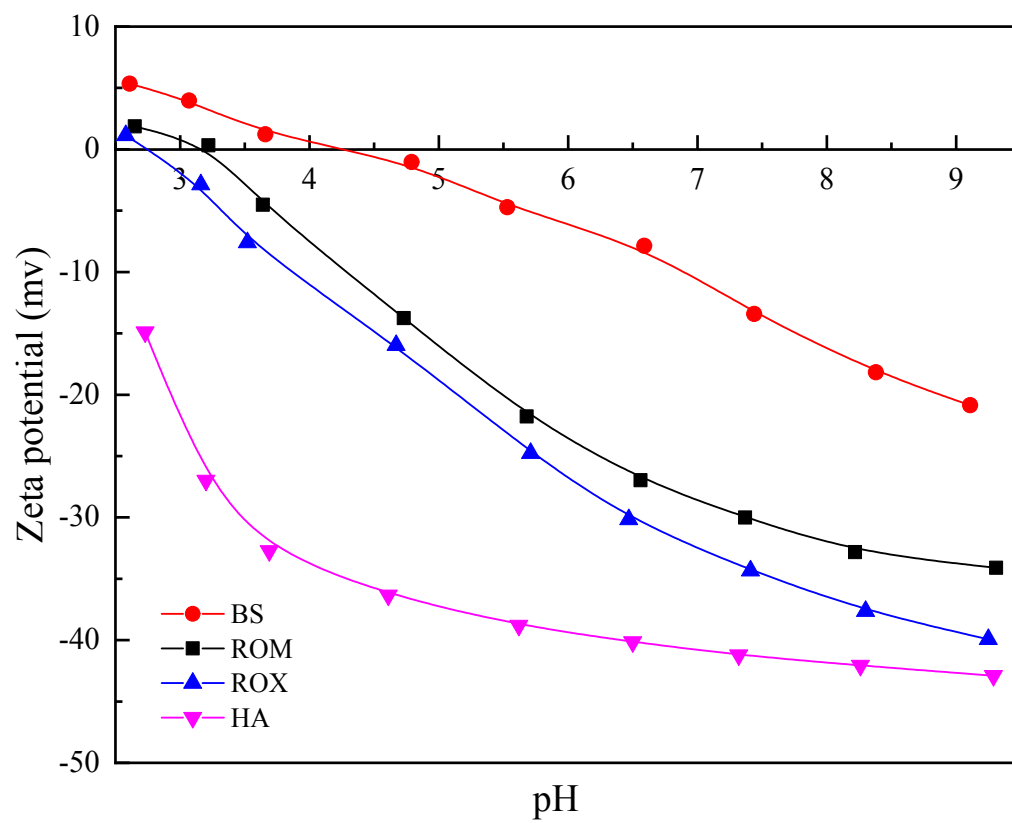

**Preparation methods of removed organic matter (ROM), removed metal oxide (ROX) and humic acid (HA).**

80 g of BS was placed in a 500 mL beaker. A certain amount of water and 10 mL of 30%  $\text{H}_2\text{O}_2$  were added. The suspension was placed in a water bath at  $70^\circ\text{C}$ – $80^\circ\text{C}$ . When the reaction had subsided, the treatment was repeated until no further reaction by the addition of more  $\text{H}_2\text{O}_2$ . The supernatant was decanted and the precipitate was rinsed three times with deionized water, air-dried and was labeled as ROM.

2 g of BS was placed in a 100 mL centrifuge tube containing 40 mL of 0.3 M Na-citrate solution and 5 mL of 1 M  $\text{NaHCO}_3$  solution. The temperature was brought to  $80^\circ\text{C}$  in a water bath, then 1 g of solid  $\text{Na}_2\text{S}_2\text{O}_4$  was added and the mixture was stirred several times and centrifuged for 5 min at 3500 r/min. The precipitate was rinsed three times with 0.01 M NaCl, air-dried and was labeled as ROX.

HA was progressively extracted seven times in a 1000 mL beaker containing a certain of BS and 0.1 M  $\text{Na}_4\text{P}_2\text{O}_7$  solution at a solid to solution ratio of 10:1 (v/w). Then the supernatant after centrifugation of the mixture at 3500 r/min was acidified to  $\text{pH} = 1.5$ – $2$  with 1 M HCl to obtain the first  $\text{HA}_1$  fraction. Finally, all the seven HA fractions were collected as HA, and then rinsed with deionized water, freeze-dried and ground for use.
